# Supplementary material for: Methylene-bis[(aminomethyl)phosphinic acids]: synthesis, acid–base and coordination properties
Source: Royal Society of Chemistry journal article supplement (doi:10.1039/c2dt32045b), 2012-11-14
Supplement: c2dt32045b.pdf [file c2dt32045b.pdf]

## Methylene-bis[(aminomethyl)phosphinic acids]: synthesis, acid-base and coordination properties

Tomáš David, Soňa Procházková, Jana Havlíčková, Jan Kotek, Vojtěch Kubíček,\* Petr Hermann, Ivan Lukeš

Department of Inorganic Chemistry, Faculty of Science, Charles University in Prague, Hlavova 2030, 128 40 Prague 2, Czech Republic. E-mail: [kubicek@natur.cuni.cz](mailto:kubicek@natur.cuni.cz). Tel.: +420 221921264. Fax: +420 221921253

### Content:

Table S1. Overall protonation constants ( $\log\beta$ ) of the title ligands.

Table S2. Overall stability constants ( $\log\beta_{hlm}$ ) of complexes with the title ligands.

Figure S1. Distribution diagrams of  $H_2L^2$  (A) and  $H_2L^3$  (B) in absence of metal ions ( $c_L = 4$  mM,  $I = 0.1$  M  $KNO_3$ ,  $25^\circ C$ ).

Figure S2. Distribution diagrams of  $H_2L^2$  in the presence of  $Cu^{2+}$  (A),  $Zn^{2+}$  (B),  $Ni^{2+}$  (C) and  $Co^{2+}$  (D) ions ( $c_L = c_M = 4$  mM,  $I = 0.1$  M  $KNO_3$ ,  $25^\circ C$ ).

Figure S3. Distribution diagrams of  $H_2L^3$  in the presence of  $Cu^{2+}$  (A),  $Zn^{2+}$  (B),  $Ni^{2+}$  (C) and  $Co^{2+}$  (D) ions ( $c_L = c_M = 4$  mM,  $I = 0.1$  M  $KNO_3$ ,  $25^\circ C$ ).

Figure S4. High resolution MS spectra of  $[CuL^1]$  (A) and  $[CuL^2]$  (B) complexes (M:L = 1:1, pH 10).

Table S3. Geometry of the bis(phosphinate) moiety.

Table S4. Geometry of the coordination sphere of  $Cu^{2+}$  ions in  $(H_2N=C(NH_2)_2)_4[Cu_2(H_1L^2)_2]CO_3 \cdot 10H_2O$ .

Table S5. Geometry of the coordination sphere of  $Co^{2+}$  ions in  $Li_2[Co_4(H_1L^1)_3(OH)] \cdot 17.5H_2O$ .

Table S6. Geometry of the  $Co_4O_4$  cage in  $Li_2[Co_4(H_1L^1)_3(OH)] \cdot 17.5H_2O$ .

Table S1. Overall protonation constants ( $\log\beta$ ) of the title ligands.

| Constant   | $H_2L^1$ | $H_2L^2$ | $H_2L^3$ |
|------------|----------|----------|----------|
| $\log b_1$ | 10.00(1) | 9.84(1)  | 9.49(3)  |
| $\log b_2$ | 18.89(1) | 18.39(1) | 18.29(2) |
| $\log b_3$ | 20.24(2) | –        | 20.38(2) |

Table S2. Overall stability constants ( $\log\beta_{hlm}$ ) of complexes with the title ligands.

| Metal ion | <i>h l m</i> | $H_2L^1$     | $H_2L^2$  | $H_2L^3$     |
|-----------|--------------|--------------|-----------|--------------|
| $Cu^{2+}$ | 0 1 1        | 10.76(2)     | 11.13(1)  | 9.87(1)      |
|           | –1 1 1       | 2.35(3)      | 3.06(2)   | 1.05(2)      |
|           | –2 1 1       | –8.91(4)     | –9.23(3)  | –9.48(4)     |
| $Zn^{2+}$ | 0 1 1        | 6.78(2)      | 6.51(1)   | 6.29(1)      |
|           | –1 1 1       | –1.26(2)     | –2.26(2)  | –2.29(1)     |
|           | –2 1 1       | –11.98(7)    | –13.28(4) | –            |
| $Ni^{2+}$ | 0 1 1        | 7.87(2)      | 7.13(1)   | 7.51(1)      |
|           | –1 1 1       | –1.17(4)     | –1.44(2)  | –0.90(2)     |
|           | –2 1 1       | –13.94(8)    | –13.94(4) | –            |
| $Co^{2+}$ | 0 1 1        | <sup>a</sup> | 7.28(6)   | 5.79(1)      |
|           | –1 1 1       | –0.73(4)     | –0.56(4)  | <sup>a</sup> |
|           | –2 1 1       | –8.91(5)     | –8.57(5)  | <sup>a</sup> |
|           | –3 1 1       | –20.60(7)    | –18.60(6) | <sup>a</sup> |

<sup>a</sup> not determined due to the formation of precipitate

Figure S1. Distribution diagrams of  $\text{H}_2\text{L}^2$  (A) and  $\text{H}_2\text{L}^3$  (B) in absence of metal ions ( $c_{\text{L}} = 4 \text{ mM}$ ,  $I = 0.1 \text{ M KNO}_3$ ,  $25^\circ\text{C}$ ).

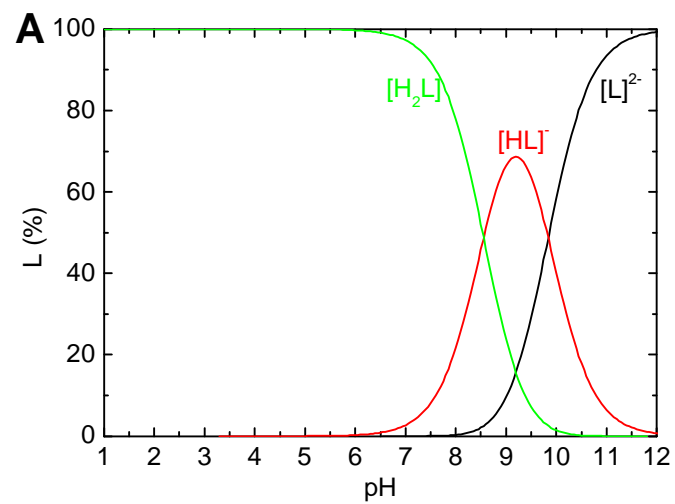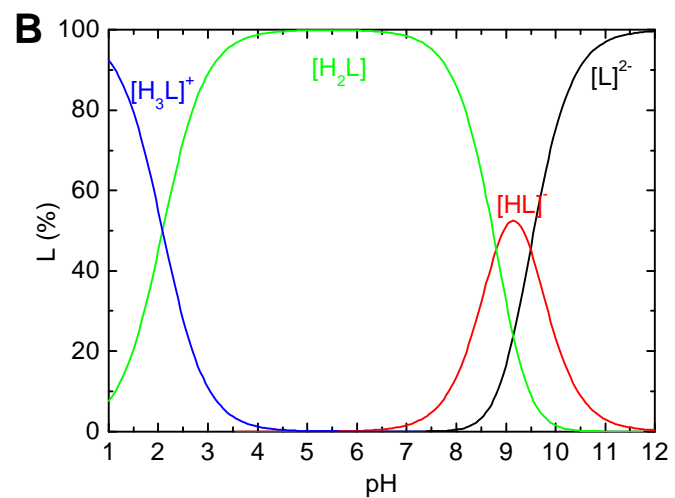

Figure S2. Distribution diagrams of  $\text{H}_2\text{L}^2$  in the presence of  $\text{Cu}^{2+}$  (A),  $\text{Zn}^{2+}$  (B),  $\text{Ni}^{2+}$  (C) and  $\text{Co}^{2+}$  (D) ions ( $c_{\text{L}} = c_{\text{M}} = 4 \text{ mM}$ ,  $I = 0.1 \text{ M KNO}_3$ ,  $25^\circ\text{C}$ ).

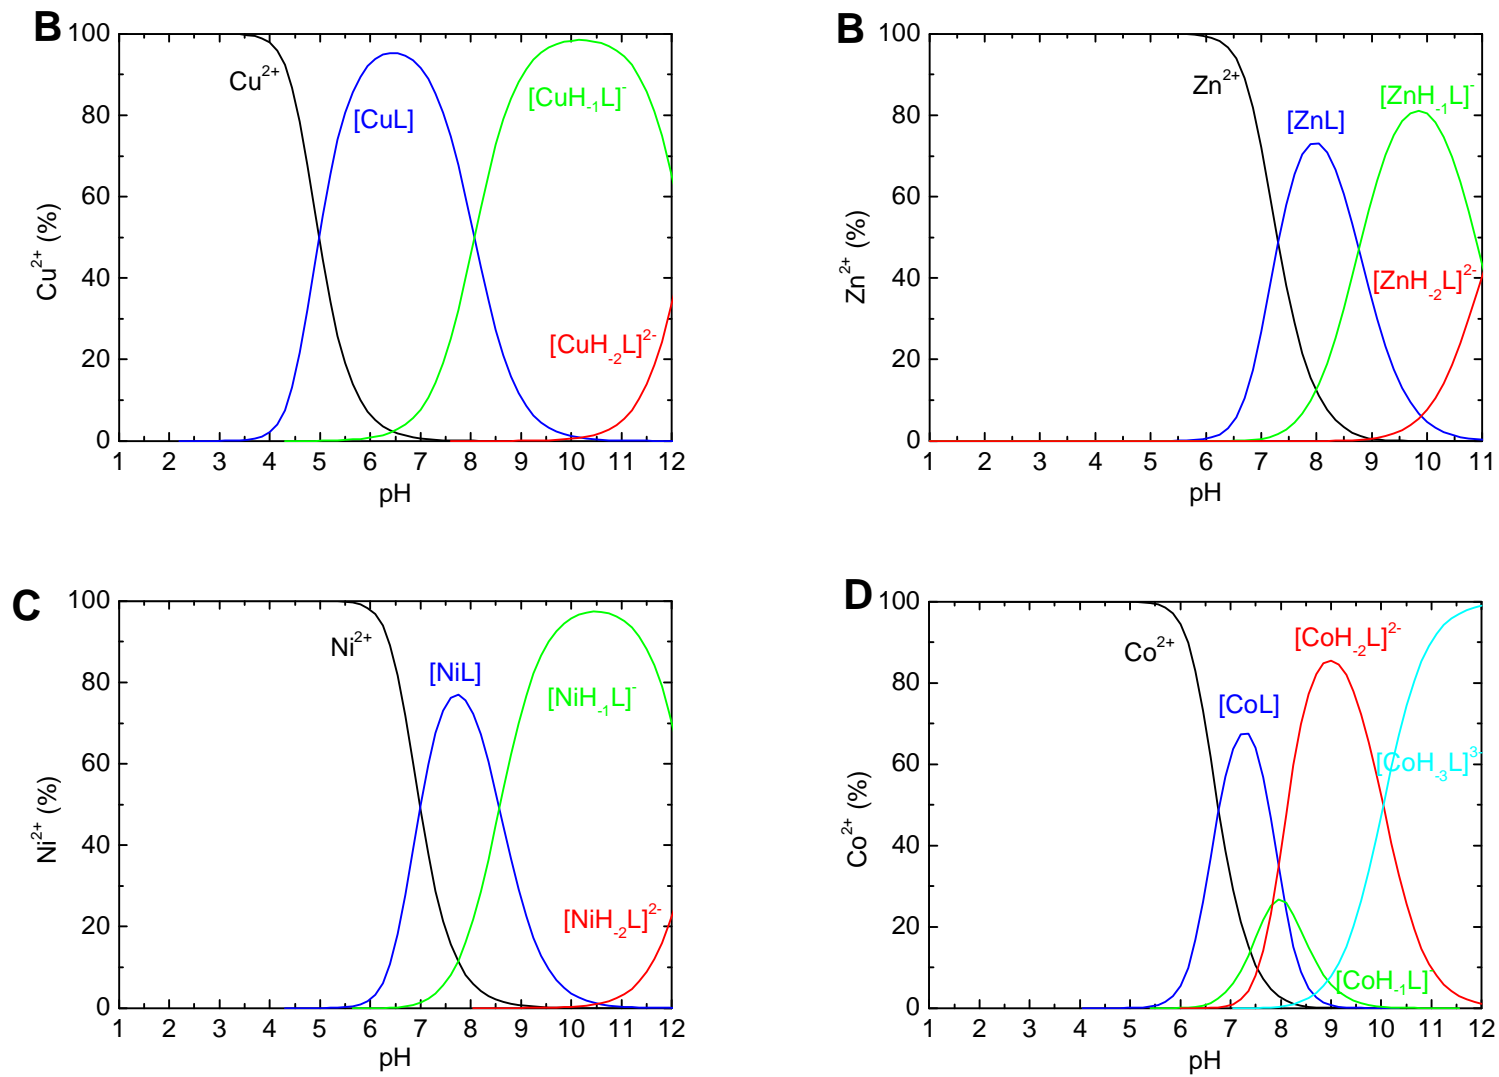

Figure S3. Distribution diagrams of  $H_2L^3$  in the presence of  $Cu^{2+}$  (A),  $Zn^{2+}$  (B),  $Ni^{2+}$  (C) and  $Co^{2+}$  (D) ions ( $c_L = c_M = 4$  mM,  $I = 0.1$  M  $KNO_3$ ,  $25^\circ C$ ).

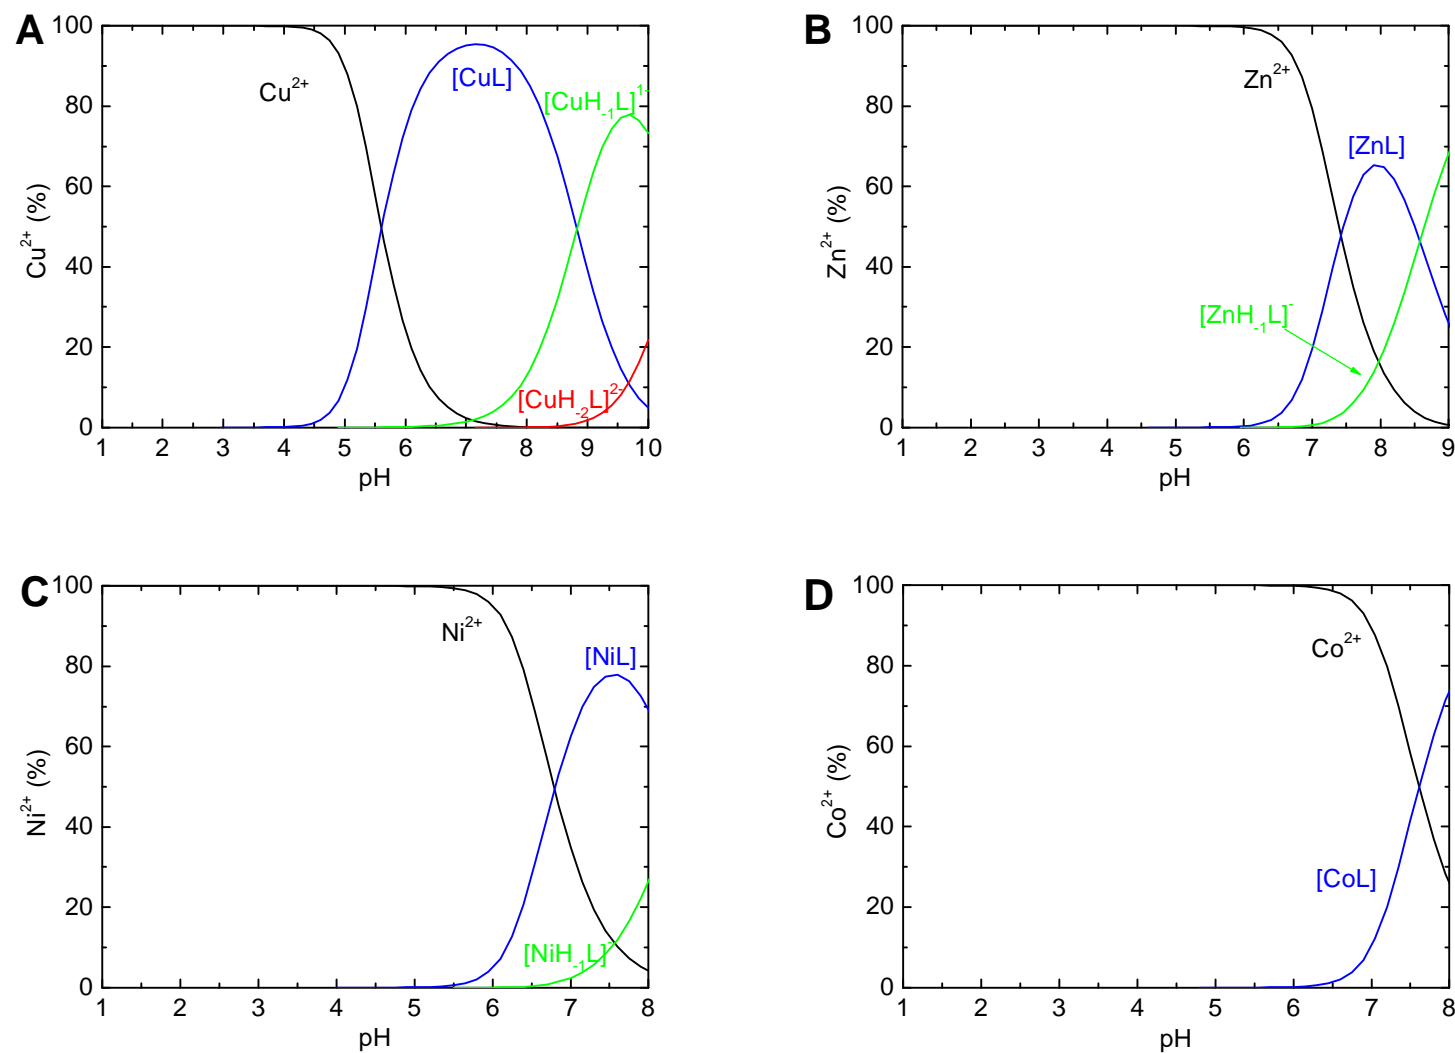

Figure S4. High resolution MS spectra of  $[\text{CuL}^1]$  (A) and  $[\text{CuL}^2]$  (B) complexes (M:L = 1:1, pH 10).

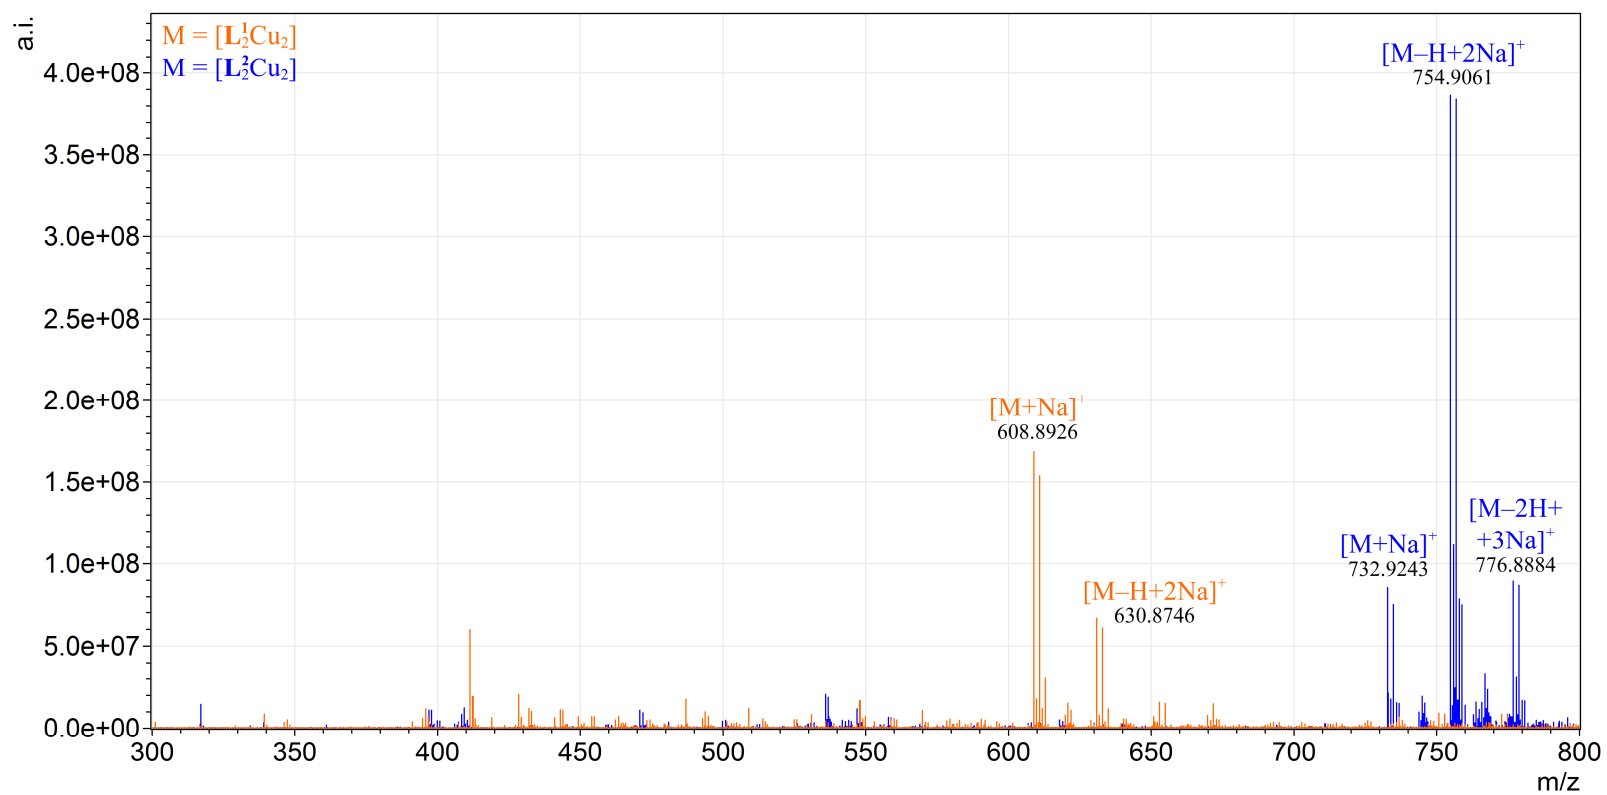

Table S3. Geometry of the bis(phosphinate) moiety.

|                                                                                                        | Distances P–C [Å]                                                    | Distances P–O [Å]                                                                                                                            | Distances C–O [Å]                | Angles P–C–P (°)                 |
|--------------------------------------------------------------------------------------------------------|----------------------------------------------------------------------|----------------------------------------------------------------------------------------------------------------------------------------------|----------------------------------|----------------------------------|
| $\text{H}_2\text{L}^1 \cdot 0.5\text{H}_2\text{O}$                                                     | 1.846(2)<br>1.854(2)                                                 | 1.5049(11)<br>1.5121(11)<br>1.5024(11)<br>1.5106(11)                                                                                         | 1.436(2)                         | 114.39(8)                        |
| $\text{H}_2\text{L}^3 \cdot \text{H}_2\text{O}$                                                        | 1.8123(9)                                                            | 1.5055(9)<br>1.5100(9)                                                                                                                       | –                                | 119.44(9)                        |
| $\text{Li}_2[\text{Co}_4(\text{H}_1\text{L}^1)_3(\text{OH})] \cdot 17.5\text{H}_2\text{O}$             | 1.849(3)<br>1.855(3)<br>1.846(3)<br>1.854(3)<br>1.847(3)<br>1.851(3) | 1.503(2)<br>1.528(2)<br>1.509(2)<br>1.526(2)<br>1.509(2)<br>1.520(2)<br>1.513(2)<br>1.521(2)<br>1.502(2)<br>1.526(2)<br>1.493(2)<br>1.531(2) | 1.442(4)<br>1.440(3)<br>1.449(3) | 107.2(2)<br>107.2(1)<br>108.6(2) |
| $(\text{CN}_3\text{H}_6)_4[\text{Cu}_2(\text{H}_1\text{L}^2)_2]\text{CO}_3 \cdot 10\text{H}_2\text{O}$ | 1.859(2)<br>1.866(2)<br>1.868(2)<br>1.872(2)                         | 1.496(2)<br>1.511(2)<br>1.508(2)<br>1.511(2)<br>1.495(2)<br>1.504(2)<br>1.503(2)<br>1.509(2)                                                 | 1.430(3)<br>1.430(3)             | 109.57(11)<br>109.32(11)         |

Table S4. Geometry of the coordination sphere of Cu<sup>2+</sup> ions in (H<sub>2</sub>N=C(NH<sub>2</sub>)<sub>2</sub>)<sub>4</sub>[Cu<sub>2</sub>(H<sub>-1</sub>L<sup>2</sup>)<sub>2</sub>]CO<sub>3</sub>·10H<sub>2</sub>O.

| Distances (Å)       | Angles (°)                  | Angles (°)                  |
|---------------------|-----------------------------|-----------------------------|
|                     | Unit 1                      |                             |
| Cu1 – N1A 2.001(2)  | N1A – Cu1 – O41A 90.02(7)   | N1B – Cu2 – O41B 89.05(7)   |
| Cu1 – O41A 1.988(2) | N1A – Cu1 – O41B 164.70(7)  | N1B – Cu2 – O41A 163.77(7)  |
| Cu1 – O41B 1.928(2) | N1A – Cu1 – N7B 93.02(8)    | N1B – Cu2 – N7A 92.23(8)    |
| Cu1 – N7B 1.998(2)  | N1A – Cu1 – O31A 85.38(7)   | N1B – Cu2 – O31B 85.83(7)   |
| Cu1 – O31A 2.639(2) | N1A – Cu1 – O51B 104.57(6)  | N1B – Cu2 – O51A 101.96(7)  |
| Cu1 – O51B 3.090(2) | O41A – Cu1 – O41B 78.37(6)  | O41B – Cu2 – O41A 78.49(6)  |
|                     | O41A – Cu1 – N7B 174.52(7)  | O41B – Cu2 – N7A 175.49(8)  |
| Cu2 – N1B 1.987(2)  | O41A – Cu1 – O31A 73.92(6)  | O41B – Cu2 – O31B 72.57(6)  |
| Cu2 – O41B 1.984(2) | O41A – Cu1 – O51B 114.64(5) | O41B – Cu2 – O51A 114.39(6) |
| Cu2 – O41A 1.927(2) | O41B – Cu1 – N7B 99.38(7)   | O41A – Cu2 – N7A 101.00(7)  |
| Cu2 – N7A 2.004(2)  | O41B – Cu1 – O31A 100.68(6) | O41A – Cu2 – O31B 100.07(6) |
| Cu2 – O31B 2.717(2) | O41B – Cu1 – O51B 72.08(6)  | O41A – Cu2 – O51A 74.41(6)  |
| Cu2 – O51A 2.908(2) | N7B – Cu1 – O31A 101.78(7)  | N7A – Cu2 – O31B 103.20(7)  |
|                     | N7B – Cu1 – O51B 68.95(6)   | N7A – Cu2 – O51A 69.56(6)   |
|                     | O31A – Cu1 – O51B 166.41(5) | O31B – Cu2 – O51A 169.35(5) |
|                     | Unit 2                      |                             |
| Cu3 – N1C 2.031(2)  | N1C – Cu3 – O41C 94.04(7)   | N1D – Cu4 – O41D 95.30(8)   |
| Cu3 – O41C 1.959(1) | N1C – Cu3 – O41D 167.67(7)  | N1D – Cu4 – O41C 168.18(9)  |
| Cu3 – O41D 1.976(2) | N1C – Cu3 – N7D 96.32(8)    | N1D – Cu4 – N7C 98.75(9)    |
| Cu3 – N7D 2.026(2)  | N1C – Cu3 – O31C 79.69(7)   | N1D – Cu4 – O31D 79.20(7)   |
| Cu3 – O31C 2.534(2) | N1C – Cu3 – O51D 93.17(7)   | N1D – Cu4 – O51C 91.49(7)   |
| Cu3 – O51D 2.503(2) | O41C – Cu3 – O41D 78.72(6)  | O41D – Cu4 – O41C 78.58(6)  |
|                     | O41C – Cu3 – N7D 167.96(7)  | O41D – Cu4 – N7C 163.04(7)  |
| Cu4 – N1D 2.024(2)  | O41C – Cu3 – O31C 79.60(6)  | O41D – Cu4 – O31D 81.02(6)  |
| Cu4 – O41D 1.962(1) | O41C – Cu3 – O51D 101.60(6) | O41D – Cu4 – O51C 104.19(6) |
| Cu4 – O41C 1.979(2) | O41D – Cu3 – N7D 92.08(7)   | O41C – Cu4 – N7C 89.13(7)   |
| Cu4 – N7C 2.025(2)  | O41D – Cu3 – O31C 108.41(6) | O41C – Cu4 – O31D 109.44(6) |
| Cu4 – O31D 2.529(2) | O41D – Cu3 – O51D 78.72(6)  | O41C – Cu4 – O51C 80.38(6)  |
| Cu4 – O51C 2.434(2) | N7D – Cu3 – O31C 96.23(7)   | N7C – Cu4 – O31D 92.29(7)   |
|                     | N7D – Cu3 – O51D 83.96(7)   | N7C – Cu4 – O51C 84.96(7)   |
|                     | O31C – Cu3 – O51D 172.84(5) | O31D – Cu4 – O51C 169.81(5) |



Table S5. Geometry of the coordination sphere of Co<sup>2+</sup> ions in Li<sub>2</sub>[Co<sub>4</sub>(H<sub>-1</sub>L<sup>1</sup>)<sub>3</sub>(OH)]·17.5H<sub>2</sub>O.

| Distances (Å) |           | Angles (°)        |           | Angles (°)        |            |
|---------------|-----------|-------------------|-----------|-------------------|------------|
| Co1 – O1      | 2.090(2)  | O41A – Co1 – O1   | 82.56(8)  | O1 – Co3 – O41C   | 83.95(8)   |
| Co1 – O41A    | 2.101(2)  | N1A – Co1 – O1    | 96.99(10) | O31B – Co3 – O41C | 167.91(8)  |
| Co1 – N1A     | 2.109(3)  | O31C – Co1 – O1   | 92.40(9)  | N1C – Co3 – O41C  | 100.73(9)  |
| Co1 – O31C    | 2.121(2)  | O51C – Co1 – O1   | 164.57(8) | O51B – Co3 – O41C | 92.60(8)   |
| Co1 – O51C    | 2.141(2)  | O41C – Co1 – O1   | 81.79(8)  | O41B – Co3 – O41C | 83.62(7)   |
| Co1 – O41C    | 2.145(2)  | N1A – Co1 – O41A  | 100.01(9) | O31B – Co3 – O1   | 91.60(8)   |
|               |           | O31C – Co1 – O41A | 168.56(8) | N1C – Co3 – O1    | 94.79(10)  |
| Co2 – O1      | 2.063(2)  | O51C – Co1 – O41A | 94.25(8)  | O51B – Co3 – O1   | 164.54(8)  |
| Co2 – O41B    | 2.091(2)  | O41C – Co1 – O41A | 83.88(8)  | O41B – Co3 – O1   | 81.90(8)   |
| Co2 – O51A    | 2.120(2)  | O31C – Co1 – N1A  | 90.77(9)  | N1C – Co3 – O31B  | 90.82(9)   |
| Co2 – N1B     | 2.124(3)  | O51C – Co1 – N1A  | 98.44(10) | O51B – Co3 – O31B | 88.71(8)   |
| Co2 – O31A    | 2.131(2)  | O41C – Co1 – N1A  | 175.77(9) | O41B – Co3 – O31B | 84.63(8)   |
| Co2 – O41A    | 2.162(2)  | O51C – Co1 – O31C | 87.88(9)  | O51B – Co3 – N1C  | 100.65(10) |
|               |           | O41C – Co1 – O31C | 85.24(8)  | O41B – Co3 – N1C  | 174.28(9)  |
| Co3 – O41C    | 2.071(2)  | O41C – Co1 – O41C | 82.85(8)  | O41B – Co3 – O51B | 82.75(8)   |
| Co3 – O1      | 2.075(2)  |                   |           |                   |            |
| Co3 – O31B    | 2.084(2)  | O41B – Co2 – O1   | 84.70(8)  | O41B – Co4 – N7B  | 94.95(9)   |
| Co3 – N1C     | 2.111(3)  | O51A – Co2 – O1   | 165.12(8) | N7C – Co4 – N7B   | 89.35(10)  |
| Co3 – O51B    | 2.138(2)  | N1B – Co2 – O1    | 97.05(9)  | N7A – Co4 – N7B   | 90.99(10)  |
| Co3 – O41B    | 2.192(2)  | O31A – Co2 – O1   | 89.41(8)  | O41A – Co4 – N7B  | 174.15(9)  |
|               |           | O41A – Co2 – O1   | 81.75(8)  | O41C – Co4 – N7B  | 92.96(9)   |
| Co4 – N7B     | 2.128(3)  | O51A – Co2 – O41B | 96.48(8)  | N7C – Co4 – O41B  | 174.28(9)  |
| Co4 – O41B    | 2.1470(2) | N1B – Co2 – O41B  | 98.64(9)  | N7A – Co4 – O41B  | 91.91(9)   |
| Co4 – N7C     | 2.148(3)  | O31A – Co2 – O41B | 167.09(8) | O41A – Co4 – O41B | 83.05(8)   |
| Co4 – N7A     | 2.154(3)  | O41A – Co2 – O41B | 84.22(8)  | O41C – Co4 – O41B | 81.68(7)   |
| Co4 – O41A    | 2.155(2)  | N1B – Co2 – O51A  | 97.43(9)  | N7A – Co4 – N7C   | 91.78(10)  |
| Co4 – O41C    | 2.201(2)  | O31A – Co2 – O51A | 86.31(8)  | O41A – Co4 – N7C  | 92.30(9)   |
|               |           | O41A – Co2 – O51A | 83.61(8)  | O41C – Co4 – N7C  | 94.36(9)   |
|               |           | O31A – Co2 – N1B  | 93.47(9)  | O41A – Co4 – N7A  | 94.57(8)   |
|               |           | O41A – Co2 – N1B  | 176.80(9) | O41C – Co4 – N7A  | 172.73(8)  |
|               |           | O41A – Co2 – O31A | 83.56(8)  | O41C – Co4 – O41A | 81.32(7)   |

Table S6. Geometry of the Co<sub>4</sub>O<sub>4</sub> cage in Li<sub>2</sub>[Co<sub>4</sub>(H<sub>-1</sub>L<sup>1</sup>)<sub>3</sub>(OH)]·17.5H<sub>2</sub>O.

| Distances (Å)       | Angles (°)                 | Angles (°)                |
|---------------------|----------------------------|---------------------------|
| Co1 – Co2 3.1629(5) | O1 – Co1 – O41A 82.56(8)   | Co1 – O1 – Co2 99.22(9)   |
| Co1 – Co3 3.1261(6) | O1 – Co1 – O41C 81.79(8)   | Co1 – O41A – Co2 95.78(8) |
| Co1 – Co4 3.2207(5) | O41A – Co1 – O41C 83.88(8) | Co1 – O1 – Co3 97.27(8)   |
| Co2 – Co3 3.1335(6) | O1 – Co2 – O41A 81.75(8)   | Co1 – O41C – Co3 95.69(8) |
| Co2 – Co4 3.1761(5) | O1 – Co2 – O41B 84.70(8)   | Co1 – O41A – Co4 98.33(8) |
| Co3 – Co4 3.2272(6) | O41A – Co2 – O41B 84.22(8) | Co1 – O41C – Co4 95.64(8) |
|                     | O1 – Co3 – O41B 81.90(8)   | Co2 – O1 – Co3 98.46(9)   |
|                     | O1 – Co3 – O41C 83.95(8)   | Co2 – O41B – Co3 94.01(8) |
|                     | O41B – Co3 – O41C 83.62(7) | Co2 – O41A – Co4 94.74(8) |
|                     | O41A – Co4 – O41B 83.05(8) | Co2 – O41B – Co4 97.08(8) |
|                     | O41B – Co4 – O41C 81.68(7) | Co3 – O41B – Co4 96.09(8) |
|                     | O41C – Co4 – O41A 81.32(7) | Co3 – O41C – Co4 98.08(8) |
